# Supplementary material for: Joint spectroscopic and theoretical investigation of cationic cyanine dye Astrazon Orange-R: solvent viscosity controlled relaxation of excited states
Source: Royal Society of Chemistry journal article supplement (doi:10.1039/c4cp05103c), 2015-01-01
Supplement: c4cp05103c1.pdf [file c4cp05103c1.pdf]

## Supporting Information

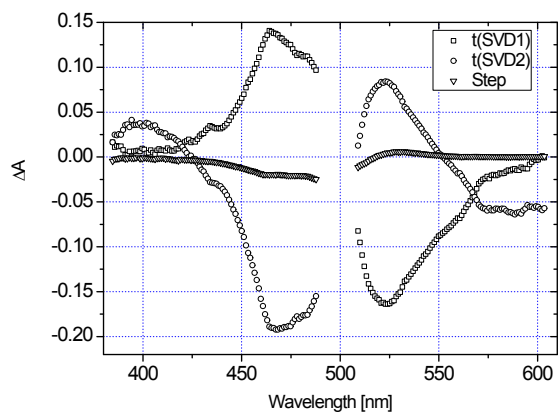

Figure S11: Decay associated differential spectra (DADS) of AO-R in MeCN

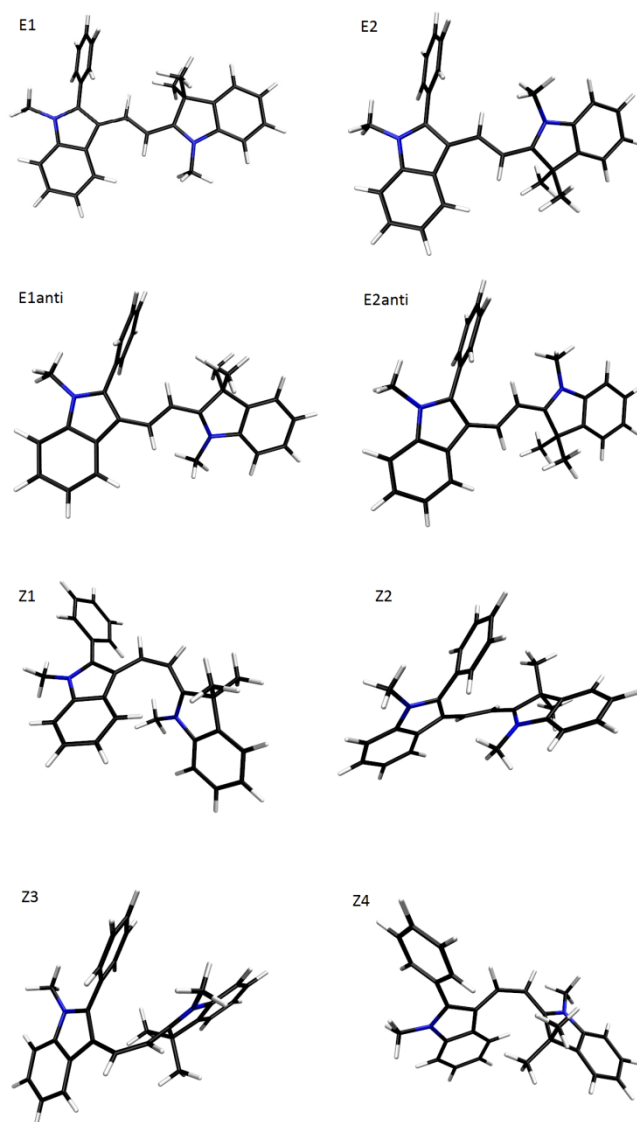

Figure S11. Optimized structures of the 4 entgegen and the 4 zusammen conformers of AO-R obtained by quantum chemical calculations.

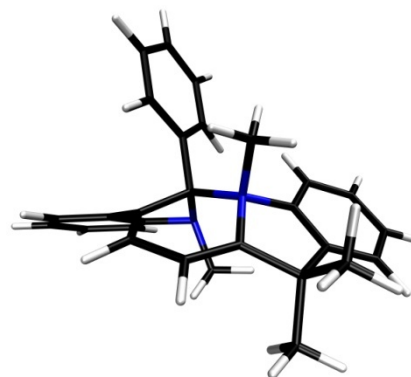

Figure S12. Cyclized conformation of AO-R obtained by quantum chemical calculations.

---

Table S11. Relative energy levels in  $\text{cm}^{-1}$  (reference is the ground state of E1) of the ground and excited states of the 8 conformers of AO-R.

---

|                |                |
|----------------|----------------|
| E1/E1*         | 0/19629.4      |
| E2/E2*         | 543.2/20308.8  |
| E2anti/E2anti* | 670.8/21176.6  |
| E1anti/E1anti* | 1186.6/21752.8 |
| Z1/Z1*         | 3048.6/23414.3 |
| Z2/Z2*         | 4252.4/23772.2 |
| Z4/Z4*         | 4885.3/24496.2 |
| Z3/Z3*         | 5714.4/25212.9 |

---
